# Supplementary material for: Inflammation is predictive of outcome in Waldenström macroglobulinemia treated by Bruton tyrosine kinase inhibitors: a multicentric real-life study
Source: PubMed Central journal article supplement — Haematologica. 2023 Aug 17;109(1):325–30. doi: 10.3324/haematol.2023.283141 (PMC10772506; doi:10.3324/haematol.2023.283141), 2023-08-17

# Inflammation is predictive of outcome in Waldenström macroglobulinemia treated by Bruton tyrosine kinase inhibitors: a multicentric real-life study

Pierre-Edouard Debureaux,<sup>1,2</sup> Nathalie Forgeard,<sup>2,3\*</sup> Dikelele Elessa,<sup>2\*</sup> Stéphanie Harel,<sup>2</sup> Laurent Frenzel,<sup>4</sup> Bruno Royer,<sup>2</sup> Alexis Talbot,<sup>2</sup> Sylvain Choquet,<sup>3</sup> Frederic Davi,<sup>5</sup> Florence Nguyen-Khac,<sup>5,6</sup> Wendy Cuccuini,<sup>7</sup> Morgane Cheminant,<sup>4</sup> Clotilde Bravetti,<sup>5</sup> Gregory Lazarian,<sup>8</sup> Sophie Kaltenbach,<sup>9</sup> Olivier Hermine,<sup>4</sup> Damien Roos-Weil,<sup>3</sup> Marion Espéli,<sup>1#</sup> Karl Balabanian<sup>1#</sup> and Bertrand Arnulf<sup>2,10#</sup>

<sup>1</sup>INSERM U1160 EMiLy, Institut de Recherche Saint-Louis, Université Paris-Cité; <sup>2</sup>Department of Immuno Hematology, Hospital Saint-Louis, Assistance Publique Hopitaux de Paris; <sup>3</sup>Department of Hematology, Sorbonne Université, Hospital Pitie-Salpetriere, Assistance Publique Hopitaux de Paris; <sup>4</sup>Department of Hematology, Hospital Necker, Assistance Publique Hopitaux de Paris; <sup>5</sup>Laboratory of Hematology, Hospital Pitie-Salpetriere, Assistance Publique Hopitaux de Paris; <sup>6</sup>Centre de Recherche des Cordeliers, Sorbonne Université, Université Paris Cité, INSERM UMR1138, Drug Resistance in Hematological Malignancies Team; <sup>7</sup>Laboratory of Cytogenetic, Hospital Saint Louis, Assistance Publique Hopitaux de Paris; <sup>8</sup>Laboratory of Hematology, Hospital Avicenne, Assistance Publique Hopitaux de Paris; <sup>9</sup>Laboratory of Hematology, Hospital Necker, Assistance Publique Hopitaux de Paris and <sup>10</sup>Department of Immunology, University of Paris Cité, Paris, France

\*NF and DE contributed equally.

#ME, KB and BA contributed equally as senior authors.

Correspondence:

P.-E. DEBUREAUX - Pierre-edouard.debureaux@aphp.fr

B. ARNULF - Bertrand.arnulf@aphp.fr

<https://doi.org/10.3324/haematol.2023.283141>

Received: March 16, 2023.

Accepted: August 7, 2023.

Early view: August 17, 2023.

©2024 Ferrata Storti Foundation

Published under a CC BY-NC license

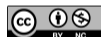

# Inflammation is predictive of outcome in Waldenström macroglobulinemia treated by Bruton tyrosine kinase inhibitors: a multicentric real-life study

Pierre-Edouard Debureau<sup>1,2</sup>, Nathalie Forgeard<sup>2,3\*</sup>, Dikelele Elessa<sup>2\*</sup>, Stephanie Harel<sup>2</sup>, Laurent Frenzel<sup>4</sup>, Bruno Royer<sup>2</sup>, Alexis Talbot<sup>2</sup>, Sylvain Choquet<sup>3</sup>, Frederic Davi<sup>5</sup>, Florence Nguyen-Khac<sup>5,6</sup>, Wendy Cuccuini<sup>7</sup>, Morgane Cheminant<sup>4</sup>, Clotilde Bravetti<sup>5</sup>, Gregory Lazarian<sup>8</sup>, Sophie Kaltenbach<sup>9</sup>, Olivier Hermine<sup>4\*\*</sup>, Damien Roos-Weil<sup>3\*\*</sup>, Marion Espéli<sup>1#</sup>, Karl Balabanian<sup>1#</sup> and Bertrand Arnulf<sup>2,10#</sup>

<sup>1</sup>INSERM U1160 EMIly, Institut de Recherche Saint-Louis, Université Paris-Cité, Paris, France

<sup>2</sup>Department of Immuno Hematology, Hospital Saint-Louis, Assistance Publique Hopitaux de Paris, Paris, France;

<sup>3</sup>Sorbonne Université, Department of Hematology, Hospital Pitie-Salpetriere, Assistance Publique Hopitaux de Paris, Paris, France

<sup>4</sup>Department of Hematology, Hospital Necker, Assistance Publique Hopitaux de Paris, Paris, France

<sup>5</sup>Laboratory of Hematology, Hospital Pitie-Salpetriere, Assistance Publique Hopitaux de Paris, Paris, France

<sup>6</sup>Centre de Recherche des Cordeliers, Sorbonne Université, Université Paris Cité, Inserm UMRS1138, Drug Resistance in Hematological Malignancies Team, Paris, France

<sup>7</sup>Laboratory of Cytogenetic, Hospital Saint Louis, Assistance Publique Hopitaux de Paris, Paris, France

<sup>8</sup>Laboratory of Hematology, Hospital Avicenne, Assistance Publique Hopitaux de Paris, Paris, France

<sup>9</sup>Laboratory of Hematology, Hospital Necker, Assistance Publique Hopitaux de Paris, Paris, France

<sup>10</sup>University of Paris Cité, Paris, France;

\*Co-second authors

\*\*Co-before last authors

#Co-last authors

**Supplementary Table 1A. Description of the global pooled cohort of WM patients who received a treatment and with CRP measure**

| <b>CRP (mg/L)</b>                                | <b>CRP &lt;5<br/>(n=170)</b> | <b>CRP 5-20<br/>(n=104)</b> | <b>CRP ≥20<br/>(n=124)</b> |
|--------------------------------------------------|------------------------------|-----------------------------|----------------------------|
| Men (n, %)                                       | 110 (65%)                    | 60 (58%)                    | 93 (75%)                   |
| Age at WM diagnosis (years, median, IQR)         | 67 [58; 76]                  | 68 [58; 75]                 | 66 [59; 76]                |
| Year of first line treatment (year, median, IQR) | 2013 [2008; 2016]            | 2014 [2011; 2017]           | 2014 [2010; 2016]          |
| Age at first line treatment (years, median, IQR) | 69 [60; 77]                  | 72 [59; 78]                 | 70 [61; 79]                |
| <i>MYD88</i> mutation (n, %, on 218 testing)     | 71 (84%)                     | 54 (95%)                    | 69 (91%)                   |
| <i>CXCR4</i> mutation (n, %, on 159 testing)     | 21 (35%)                     | 17 (36%)                    | 8 (15%)                    |
| Del6q (n, %, on 205 testing)                     | 8 (10%)                      | 19 (31%)                    | 33 (48%)                   |

WM: Waldenström macroglobulinemia, IQR: interquartile

**Supplementary Table 1B. Univariate analysis for time to next treatment (TTNT)**

| Variable                                               | HR (95% CI for HR)      | p-value     |
|--------------------------------------------------------|-------------------------|-------------|
| Sex                                                    | 0.7 (0.35-1.4)          | 0.30        |
| Age at WM diagnosis                                    | 1 (0.98-1.1)            | 0.32        |
| Kappa (versus Lambda)                                  | 1.4 (0.44-4.7)          | 0.54        |
| IMWW score Adverse (vs Low or Intermediate)            | 1.1 (0.4-3.2)           | 0.82        |
| Age at WM diagnosis > 65 years                         | 1.3 (0.68-2.4)          | 0.46        |
| Hemoglobin < 11.5 g/dL                                 | 1.22 (0.41-3.5)         | 0.72        |
| <b>Platelets &lt; 100 G/L</b>                          | <b>2.38 (1.02-5.55)</b> | <b>0.04</b> |
| β2-microglobulin > 3 mg/L                              | 1.6 (0.44-5.7)          | 0.48        |
| Monoclonal IgM > 70 g/L                                | 0.76 (0.1-5.7)          | 0.79        |
| LDH > 250 UI/L                                         | 0.52 (0.23-1.2)         | 0.13        |
| <i>MYD88</i> mutation                                  | 0.48 (0.11-2.1)         | 0.33        |
| <b><i>CXCR4</i> mutation</b>                           | <b>3.8 (1.5-9.6)</b>    | <b>0.01</b> |
| Del6q                                                  | 1.3 (0.49-3.4)          | 0.60        |
| Line of WM treatment before BTKi                       | 1.3 (0.97-1.8)          | 0.08        |
| Age at BTKi initiation                                 | 1 (0.97-1)              | 0.9         |
| Year of BTKi initiation                                | 0.85 (0.7-1)            | 0.11        |
| <b>Inflammatory (CRP ≥ 20 mg/L) at BTKi initiation</b> | <b>0.43 (0.22-0.81)</b> | <b>0.01</b> |

BTKi: Bruton tyrosine kinase inhibitors, ISSWM: International prognosis Score System for Waldenström Macroglobulinemia, WM: Waldenström macroglobulinemia

**Supplementary Figure 1. Global cohort analysis. (A) Time to next treatment (TTNT) survival curves at first line in the pooled cohort with 3 levels of CRP (0-5, 5-20 and 20 mg/L).** Dotted line represents the median of TTNT survival. **(B) Maximally selected rank statistics on pooled global cohort for TTNT at first line. Standardized log-rank statistics was performed on CRP level (continuous variable) at different cut-off.** The dotted line (here at 22 mg/L of CRP) showed the best cut-off to separate the cohort into 2 groups of different survival (HR 4.9 for 22 mg/L). **(C-D) Del6q (C) and CXCR4 (D) incidence among the global pooled cohort of WM patients separated in 3 groups based on the CRP level (CRP < 5 mg/L, CRP 5-20 mg/L, CRP ≥ 20 mg/L)**

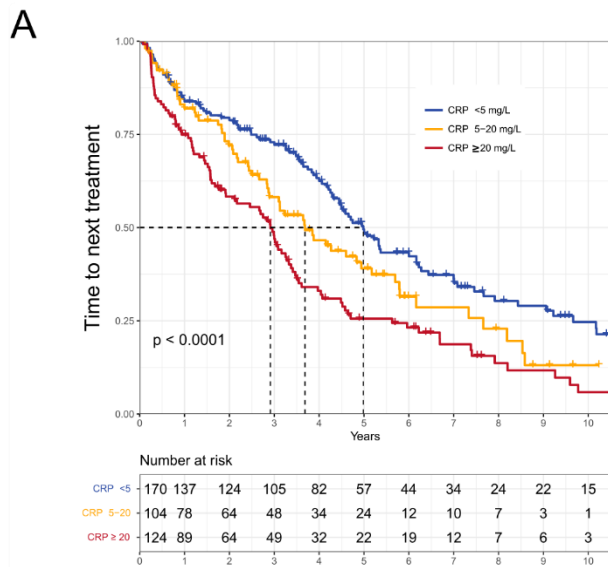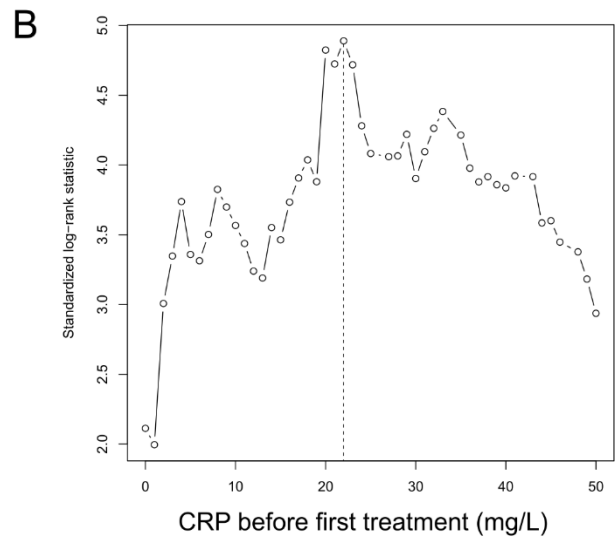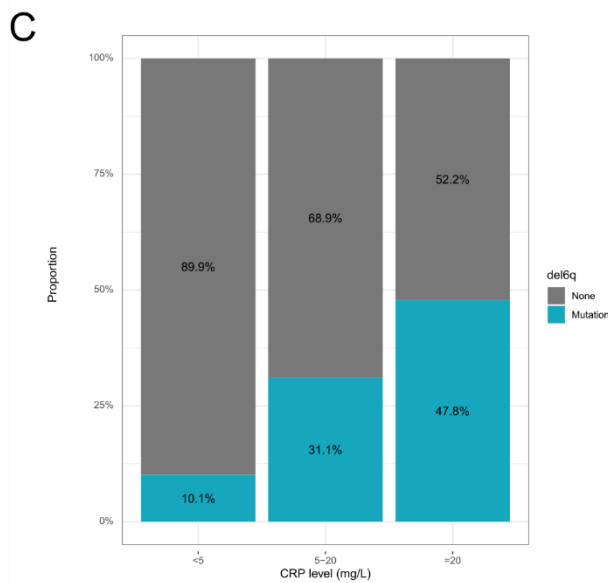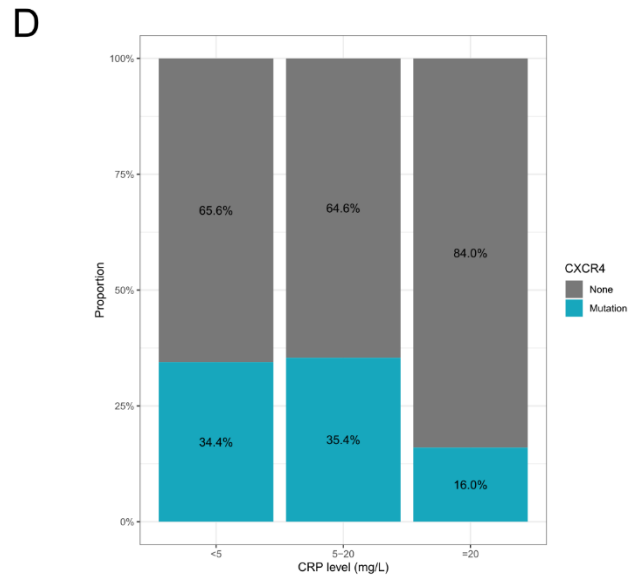

**Supplementary Figure 2. BTK cohort analysis. (A) Time to next treatment (TTNT) survival curves after BTK treatment with 3 levels of CRP (0-5, 5-20 and 20 mg/L). Dotted line represents the median of TTNT survival. (B) Maximally selected rank statistics on BTKi cohort for TTNT. Standardized log-rank statistics was performed on CRP level (continuous variable) at different cut-off (C) Overall survival between inflammatory WM (red) and non-inflammatory WM (blue) after BTKi treatment.**

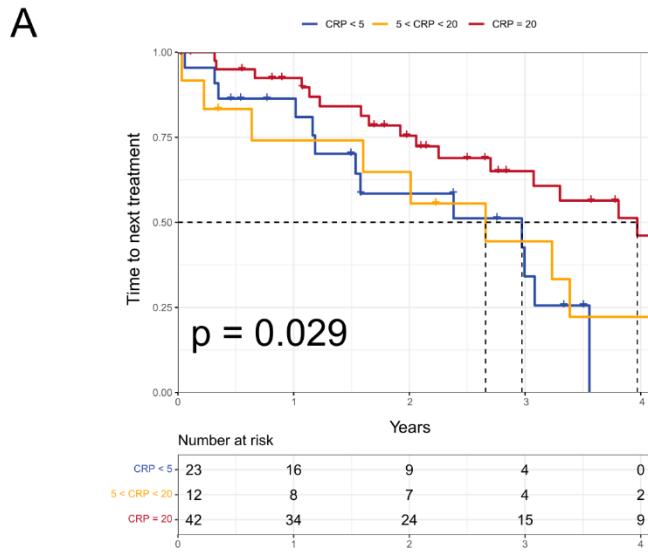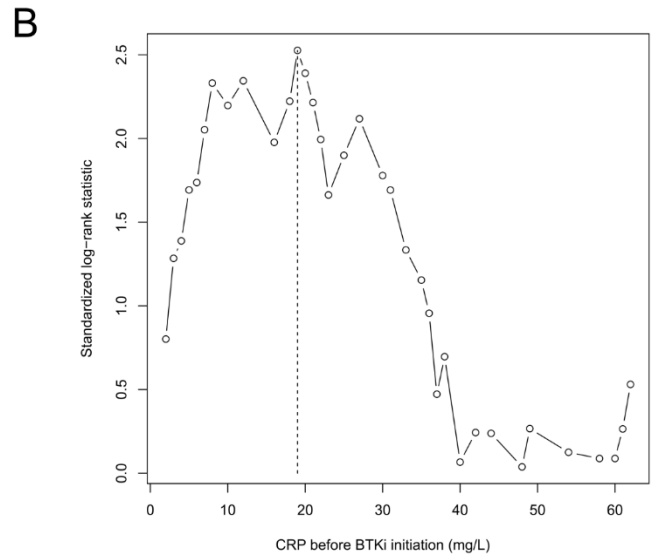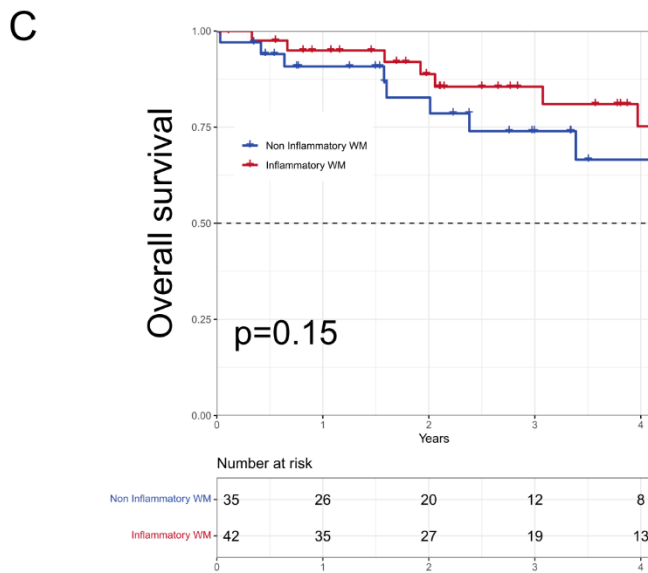

Supplement: 2023_283141_DEBUREAUX_SUPPL.pdf [file 2023_283141_DEBUREAUX_SUPPL.pdf]
